# Supplementary material for: Arabidopsis RADICAL-INDUCED CELL DEATH1 is involved in UV-B signaling
Source: Royal Society of Chemistry journal article supplement (doi:10.1039/b901187k), 2009-04-09
Supplement: b901187k.pdf [file b901187k.pdf]

## Arabidopsis *RADICAL-INDUCED CELL DEATH1* is involved in UV-B signaling

Lei Jiang <sup>a</sup>, Yan Wang <sup>a, b</sup>, Lars Olof Björn <sup>a, c</sup>, Shaoshan Li <sup>a, \*</sup>

<sup>a</sup> Key Laboratory of Ecology and Environmental Science in Guangdong Higher Education, School of Life Science, South China Normal University, Guangzhou 510631, China

<sup>b</sup> Department of Environmental Engineering, College of Science & Engineering, Jinan University, Guangzhou 510632, China

<sup>c</sup> Department of Cell and Organism Biology, Lund University, Sölvegatan 35, SE-223 62 Lund, Sweden

### Supplemental Materials

Fig. S1

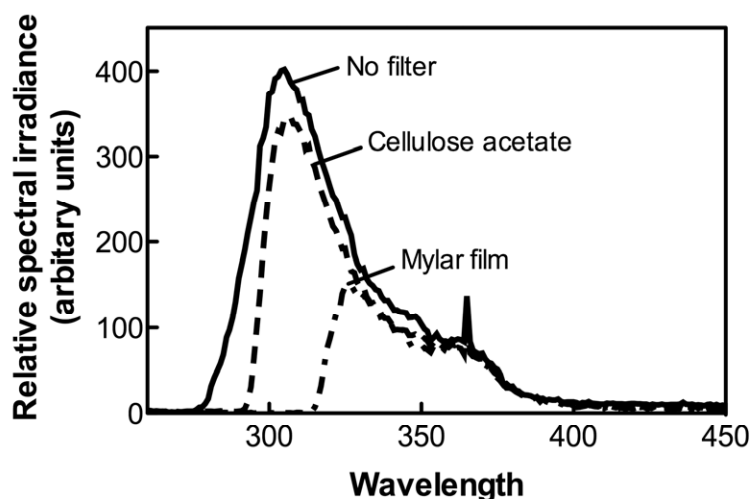

**Fig. S1** Relative emission spectrum of the unshielded UV-B lamps (no filter) and relative irradiance spectra under the cellulose acetate filter (transmitting both UV-A and UV-B) and Mylar film (transmitting only UV-A as control).

Fig. S2

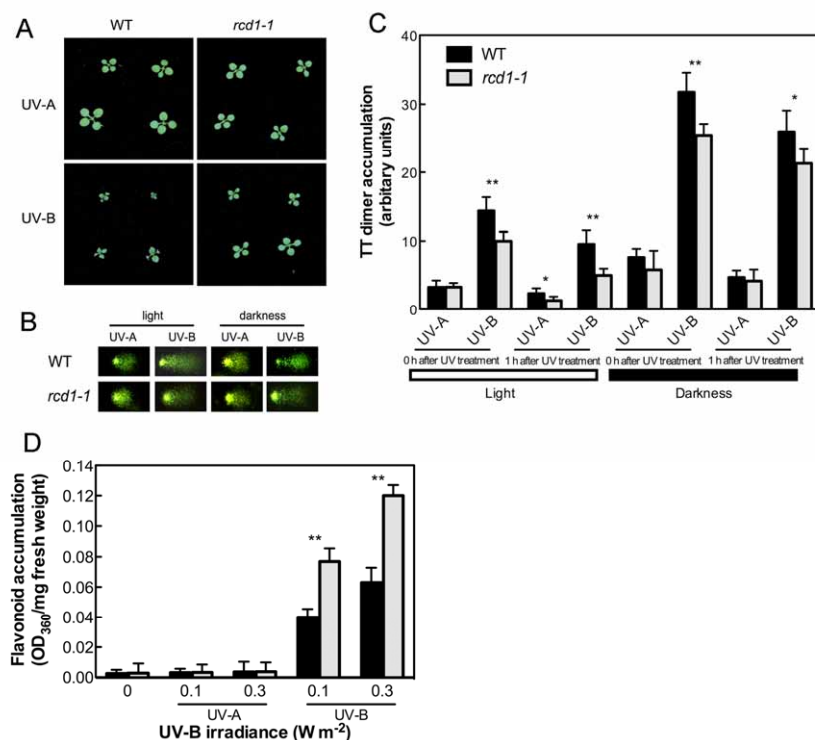

**Fig. S2** Phenotypic analysis of *rcd1-1* mutant under UV-B radiation.

(a) *rcd1-1* mutants are tolerant to supplementary UV-B. Ten-days old wild type and *rcd1-1* mutant plants were grown in white light ( $100 \mu\text{mol m}^{-2} \text{s}^{-1}$ ) with or without UV-B radiation ( $0.3 \text{ W m}^{-2}$ ) for 3 days.

(b) and (c) TT dimer accumulation in wild-type (black bars) and *rcd1-1* (gray bars) mutant under UV-B radiation. Wild type Col and *rcd1-1* mutant plants grown for 3 weeks in white light ( $100 \mu\text{mol m}^{-2} \text{s}^{-1}$ ) were transferred to UV-B radiation ( $0.4 \text{ W m}^{-2}$ ) for 5 h in white light or darkness. Leaf tissue was harvested immediately after UV-B treatment (0 h after UV-B radiation) or 1 h after UV-B radiation. (b), Typical comet assay images (with T4 endonuclease V treatment) illustrated DNA damage in wild-type and *rcd1-1* mutant during UV-B radiation for 5h. (c), TT dimer accumulation calculated by Olive Tail Moment (OTM) from comet images. Data shown are means ( $\pm$ standard deviation) of three independent replications.

(d) UV-B-induced flavonoid accumulation is increased in *rcd1-1*. Wild type (black bars) and *rcd1-1* (gray bars) mutant plants grown for 3 weeks in white light ( $100 \mu\text{mol m}^{-2} \text{s}^{-1}$ ) were transferred to various irradiance of UV-B for 12 h in white light. Data shown are means ( $\pm$ standard deviation) of three independent replications.

Fig. S3

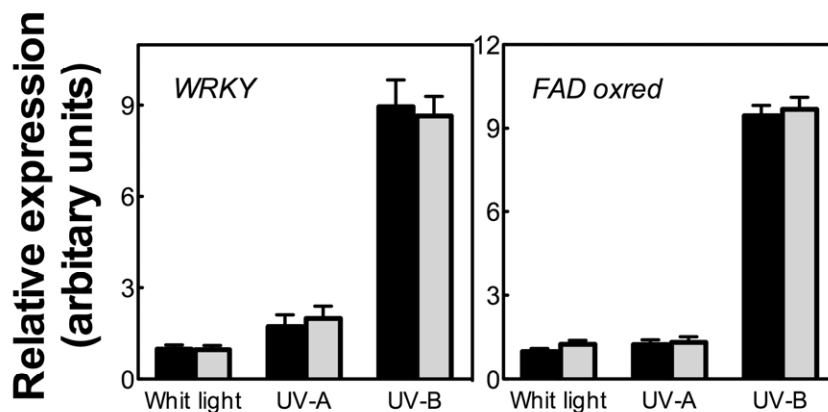

**Fig. S3** Relative expression of UV-B-induced UVR8-regulated, HY5-independent genes in wild-type (black bars) and *rcd1-1* mutant (gray bars) under UV-B radiation. Wild type Col and *rcd1-1* mutant plants grown for 3 weeks in a low fluence rate of ( $30 \mu\text{mol m}^{-2} \text{s}^{-1}$ ) white light were transferred to UV-B radiation ( $0.3 \text{ W m}^{-2}$ ) for 5h in white light. mRNA levels of *WAKY* and *FAD oxred* were quantified by real-time reverse transcriptase-PCR. The relative expression of transcripts was normalized with respect to *18S* rRNA. Gene expression in wild type without UV radiation was arbitrarily set as 1. Data shown are means ( $\pm$ standard deviation) of three independent replications. There are no significant differences between the wild type and the *rcd1-1* mutant.
